# Supplementary material for: TRIM7 ubiquitinates SARS-CoV-2 membrane protein to limit apoptosis and viral replication
Source: PubMed Central journal article supplement — bioRxiv. 2024 Jun 17:2024.06.17.599107. Preprint. [Version 1] doi: 10.1101/2024.06.17.599107 (PMC11212893; doi:10.1101/2024.06.17.599107), 2024-06-17
Supplement: media-1.pdf [file media-1.pdf]

## SUPPLEMENTARY DATA

### TRIM7 ubiquitinates SARS-CoV-2 membrane protein to limit apoptosis and viral replication

Maria Gonzalez-Orozco<sup>1</sup>, Hsiang-chi Tseng<sup>2</sup>, Adam Hage<sup>1</sup>, Hongjie Xia<sup>3</sup>, Padmanava Behera<sup>2</sup>, Kazi Afreen<sup>2</sup>, Yoatzin Peñaflor-Tellez<sup>2</sup>, Maria I. Giraldo<sup>1</sup>, Matthew Huante<sup>1</sup>, Lucinda Puebla-Clark<sup>4</sup>, Sarah van Tol<sup>1</sup>, Abby Odle<sup>2</sup>, Matthew Crown<sup>5</sup>, Natalia Teruel<sup>6</sup>, Thomas R Shelite<sup>4</sup>, Vineet Menachery<sup>1</sup>, Mark Endsley<sup>1</sup>, Janice J. Endsley<sup>1</sup>, Rafael J. Najmanovich<sup>6</sup>, Matthew Bashton<sup>5</sup>, Robin Stephens<sup>4,7</sup>, Pei-Yong Shi<sup>3</sup>, Xuping Xie<sup>3</sup>, Alexander N. Freiberg<sup>8</sup>, Ricardo Rajsbaum<sup>1,2,\*</sup>

#### Author affiliations and footnotes

<sup>1</sup>Department of Microbiology and Immunology, University of Texas Medical Branch, Galveston, TX

<sup>2</sup>Center for Virus-Host-Innate-Immunity, RBHS Institute for Infectious and Inflammatory Diseases, and Department of Medicine, New Jersey Medical School, Rutgers University, Newark, NJ

<sup>3</sup>Department of Biochemistry and Molecular Biology, University of Texas Medical Branch, Galveston, TX

<sup>4</sup>Department of Internal Medicine, Division of Infectious Diseases, University of Texas Medical Branch, Galveston, TX

<sup>5</sup>Hub for Biotechnology in the Built Environment, Department of Applied Sciences, Faculty of Health and Life Sciences, Northumbria University, Newcastle, UK

<sup>6</sup>Department of Pharmacology and Physiology, Faculty of Medicine, Université de Montréal, Montreal, Canada

<sup>7</sup>Center for Immunity and Inflammation and Department of Pharmacology, Physiology and Neuroscience, New Jersey Medical School, Rutgers University, Newark, NJ

<sup>8</sup>Department of Pathology, University of Texas Medical Branch, Galveston, TX

\*Corresponding author: [ricardo.rajsbaum@rutgers.edu](mailto:ricardo.rajsbaum@rutgers.edu)

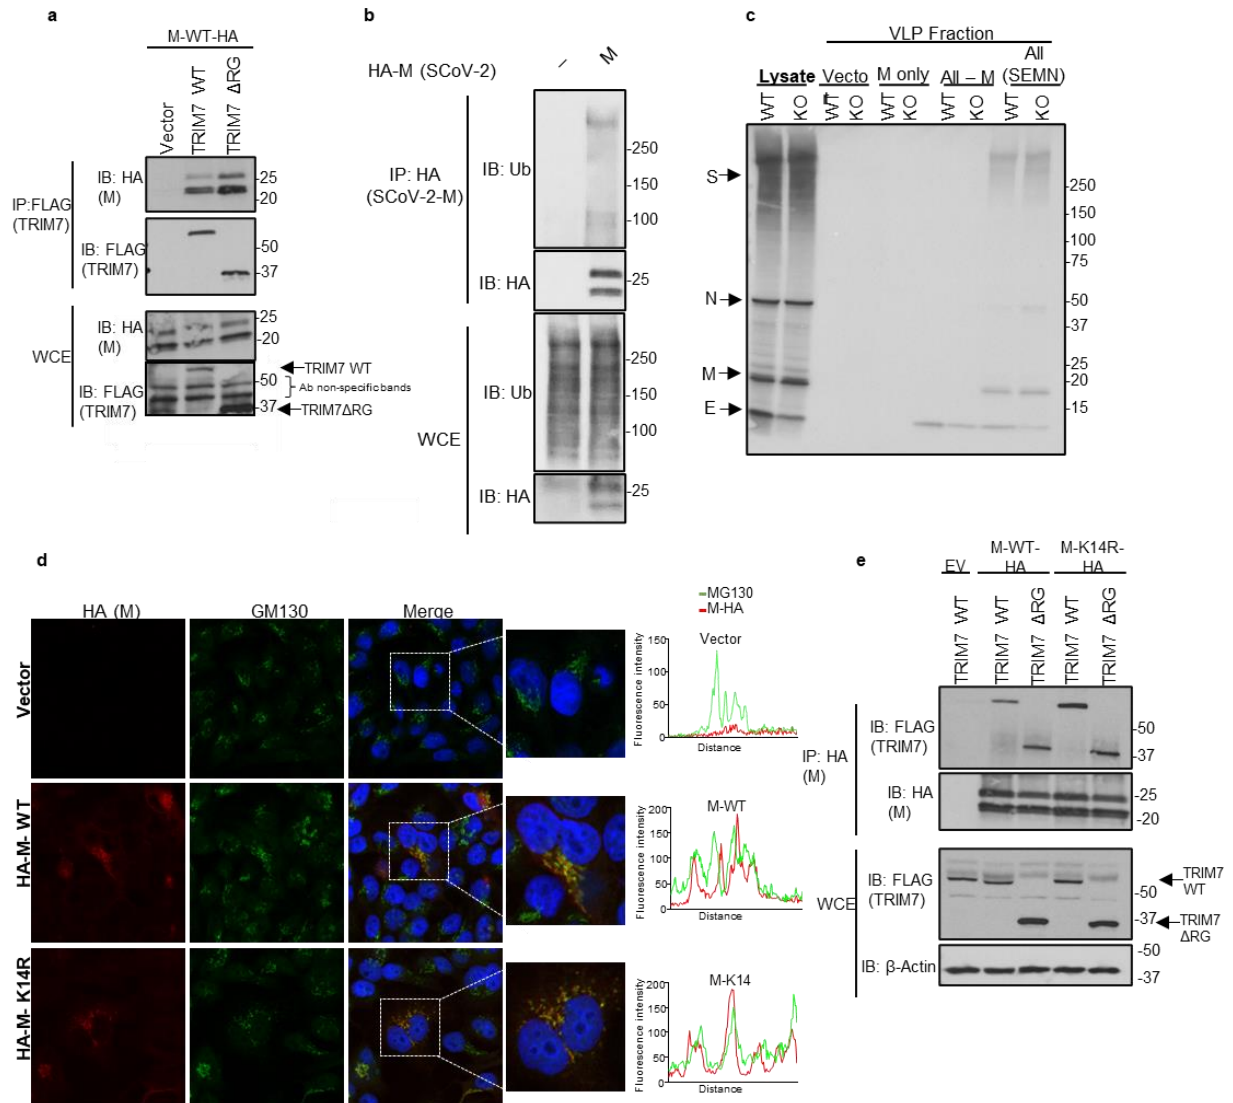

**Figure S1. Ubiquitination of M by TRIM7 does not affect budding.** HEK 293T cells transfected with a) 200ng or TRIM7 WT or ΔRG-FLAG and 100ng of M-HA and immunoprecipitated with FLAG beads. b) 200ng of M-HA and immunoprecipitated using HA beads c) VLPs in supernatant released by A549 WT and TRIM7 KO cells (KO). d, Confocal microscopy of HeLa cells expressing M-WT-HA or M-K14R-HA (Red) and label with anti-MG130 (Golgi Marker) for 24 hours. Colocalization profile bottom show the fluorescence intensity. e) 200ng or TRIM7 WT or ΔRG-FLAG and 100ng of M-HA (WT or K14R) and immunoprecipitated with HA beads. Representative experiments of at least 2 independent experiments

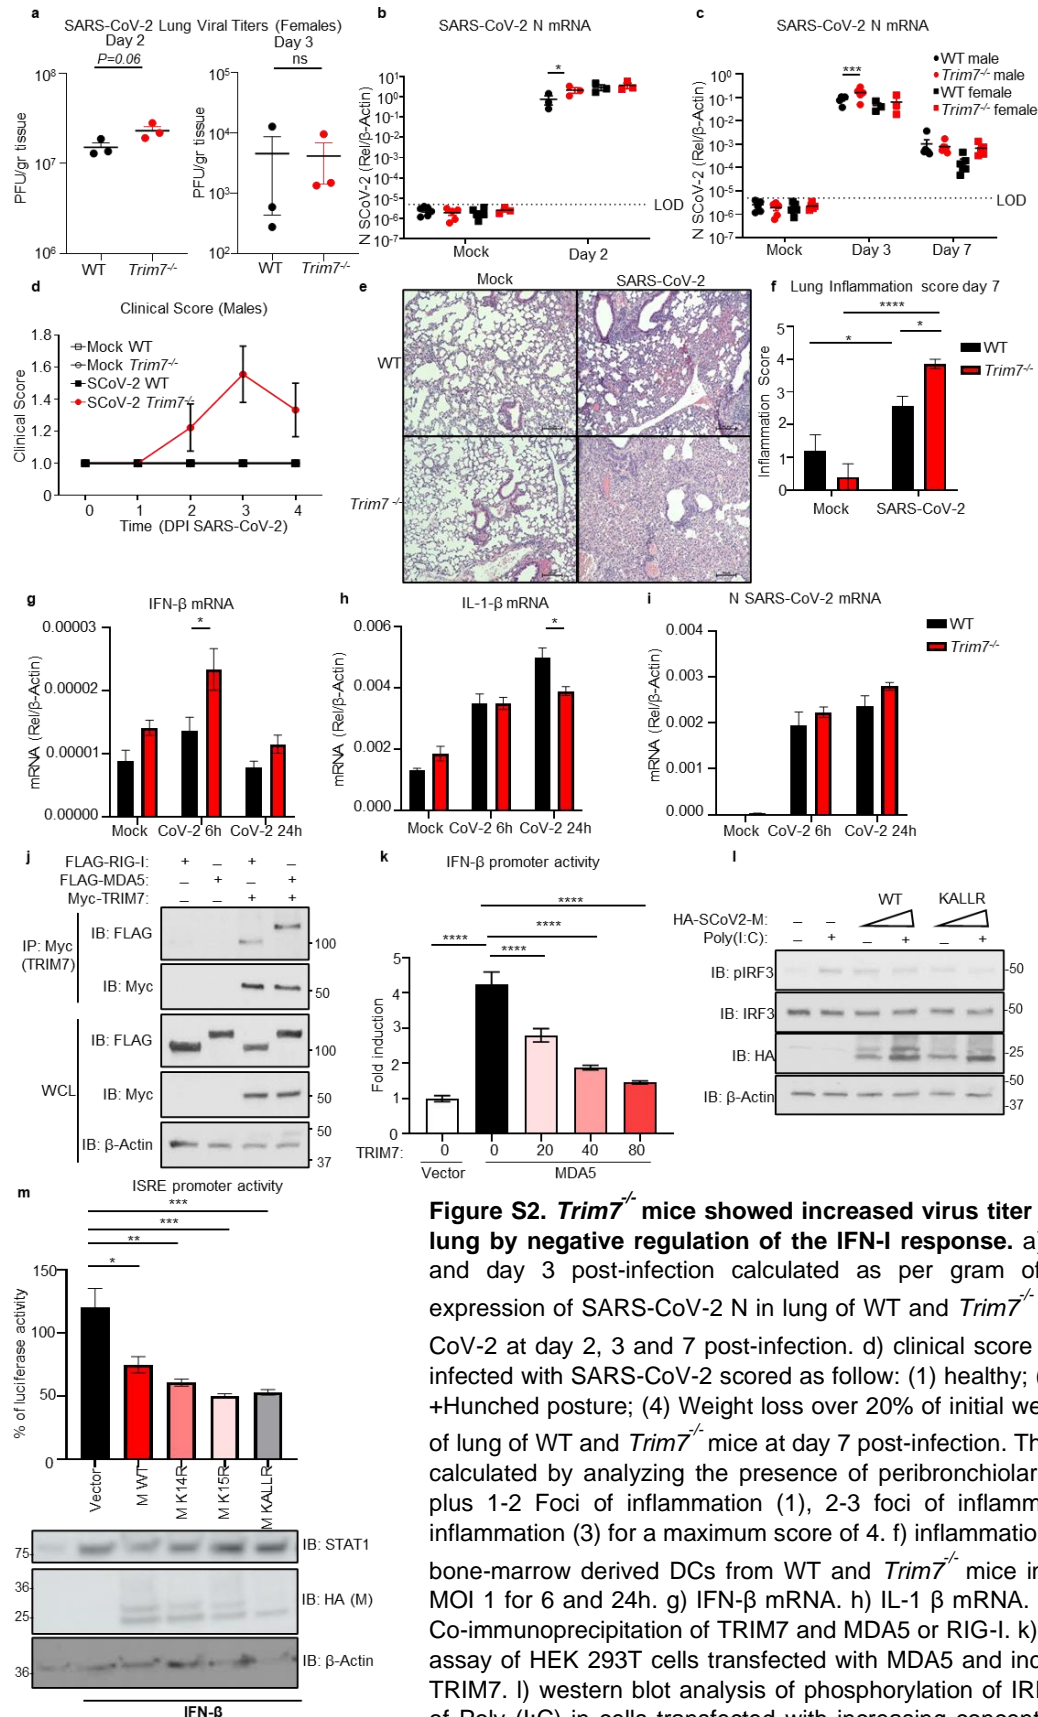

**Figure S2. *Trim7*<sup>-/-</sup> mice showed increased virus titer and inflammation in the lung by negative regulation of the IFN-I response.** a) lung viral titers at day 2 and day 3 post-infection calculated as per gram of tissue. b-c) viral RNA expression of SARS-CoV-2 N in lung of WT and *Trim7*<sup>-/-</sup> mice infected with SARS-CoV-2 at day 2, 3 and 7 post-infection. d) clinical score of WT and *Trim7*<sup>-/-</sup> males infected with SARS-CoV-2 scored as follow: (1) healthy; (2) Ruffled fur; (3) score 2 +Hunched posture; (4) Weight loss over 20% of initial weight. e) histology analysis of lung of WT and *Trim7*<sup>-/-</sup> mice at day 7 post-infection. The inflammatory score was calculated by analyzing the presence of peribronchiolar infiltrates (Yes=1, No=0) plus 1-2 Foci of inflammation (1), 2-3 foci of inflammation (2) and 3+ foci of inflammation (3) for a maximum score of 4. f) inflammation score. qPCR analysis of bone-marrow derived DCs from WT and *Trim7*<sup>-/-</sup> mice infected with SARS-CoV-2 MOI 1 for 6 and 24h. g) IFN-β mRNA. h) IL-1 β mRNA. i) N SARS-CoV-2 RNA. j) Co-immunoprecipitation of TRIM7 and MDA5 or RIG-I. k) IFN-β Luciferase reporter assay of HEK 293T cells transfected with MDA5 and increasing concentrations of TRIM7. l) western blot analysis of phosphorylation of IRF3 induced by stimulation of Poly (I:C) in cells transfected with increasing concentrations of M-WT or KallR mutant. m) ISRE luciferase reporter assay of cells transfected with M-WT or mutants K14R, K15R or KallR stimulated with IFN- β for 24h. Data are depicted as Mean ±SEM. T-test analysis, one-way or 2-way Tukey's multiple comparisons tests. *p* < 0.001 \*\*, *p* < 0.0001 \*\*\*, *p* < 0.00001 \*\*\*\*.

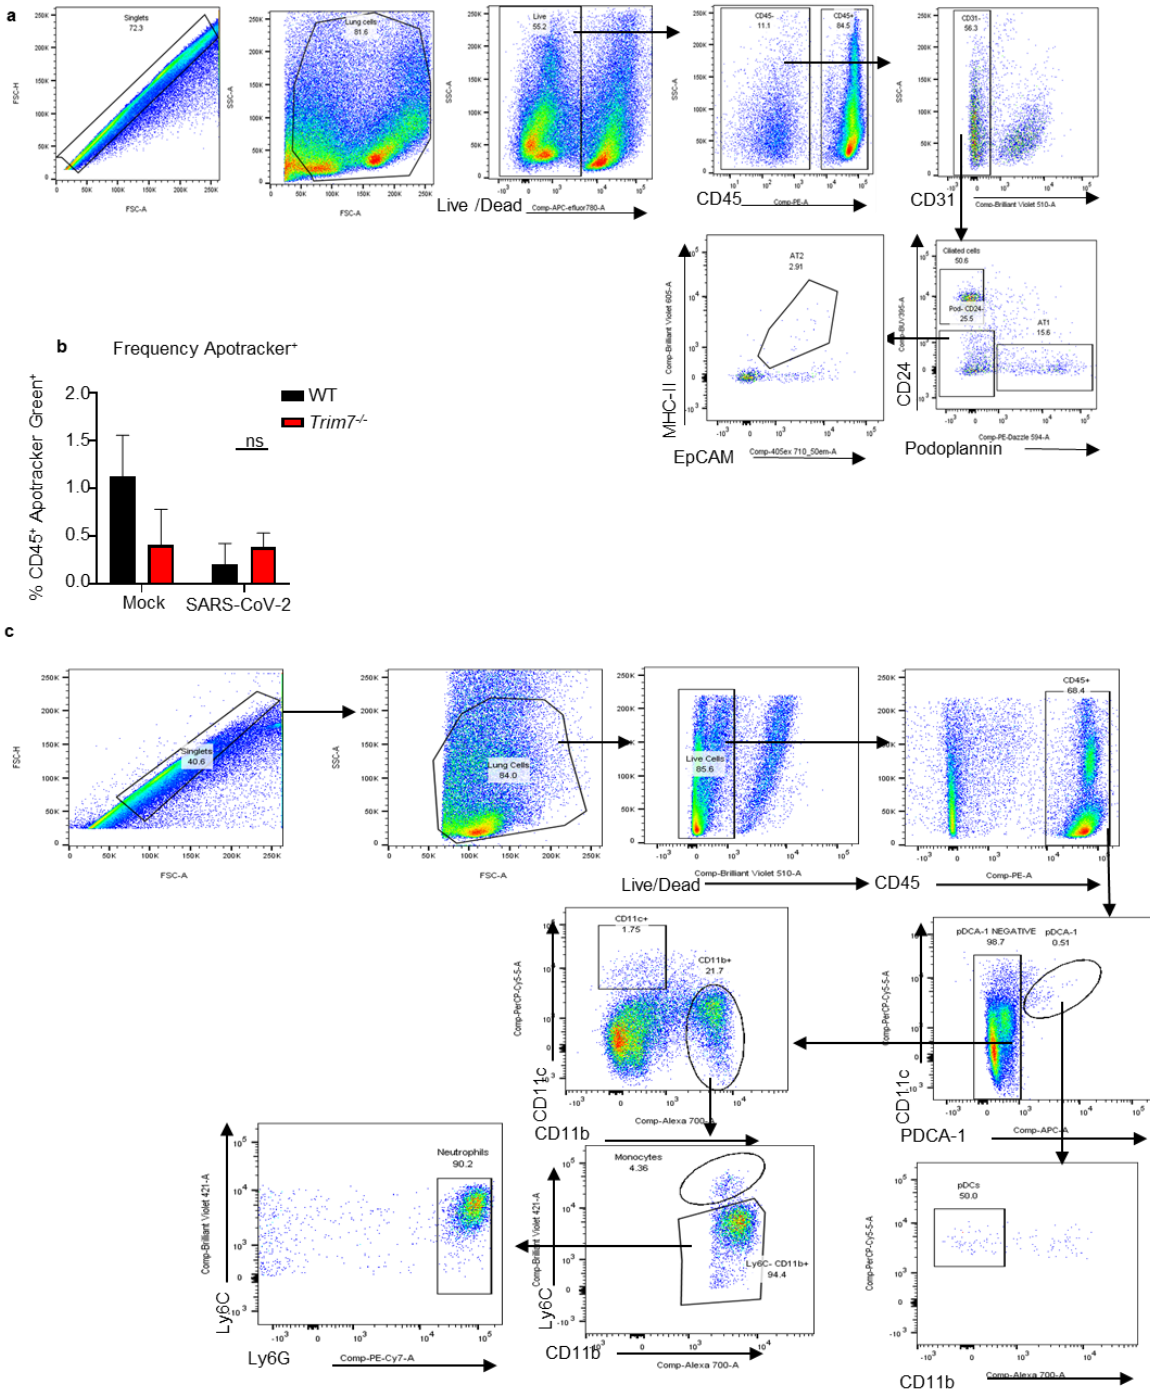

**Figure S3. Flow cytometry gating strategy.** a) flow cytometry gating strategy for lung epithelial cells. b) frequency of cells CD45<sup>+</sup> Apotracker<sup>+</sup> in lung of mice infected with SARS-CoV-2 at day 3 post-infection. c) gating strategy for flow cytometry analysis of innate immune cells.

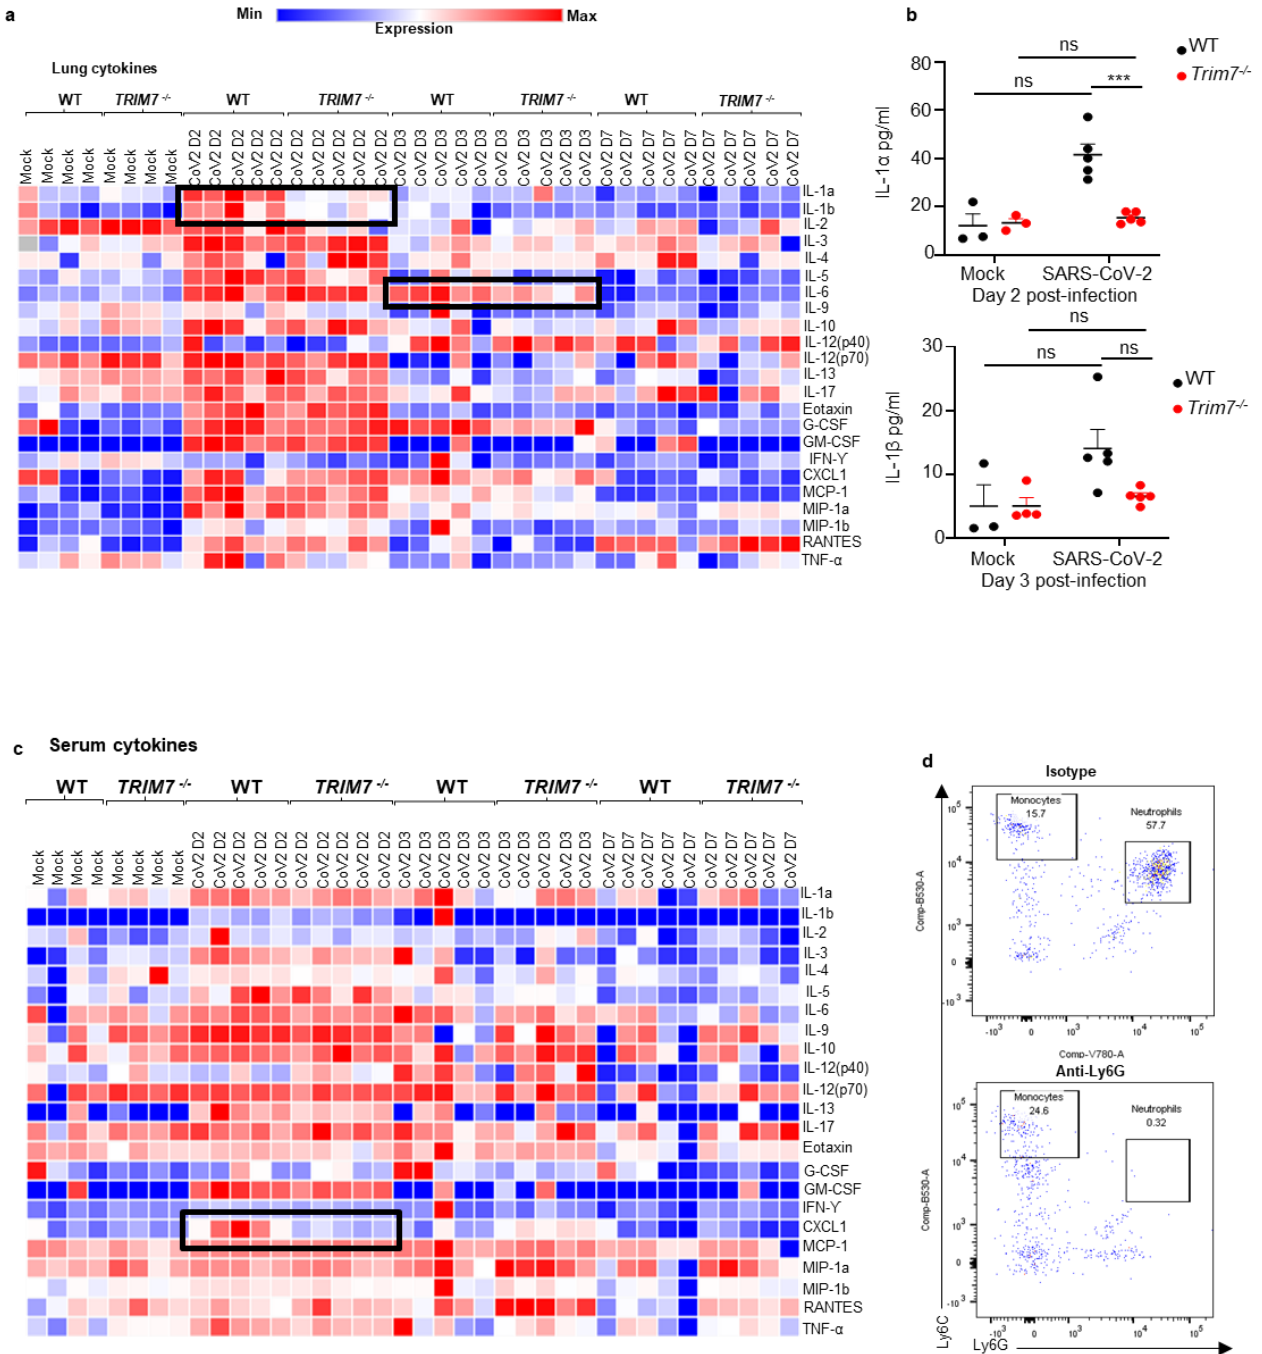

**Figure S4. Multiplex analysis of lung homogenates and serum.** a) heat map of cytokine expression in lung of infected mice. b) lung homogenate concentration levels of IL-1α in lung of WT and *Trim7*<sup>-/-</sup> mice. c) heat map of cytokine expression in serum of infected mice. d) representative dot blot of peripheral blood staining showing depletion of neutrophils CD45<sup>+</sup> CD11c<sup>-</sup> CD11b<sup>+</sup> Ly6C<sup>int</sup>, Ly6G<sup>hi</sup>. Data are depicted as Mean ± SEM. 2-way Tukey's multiple comparisons tests. p < 0.001 \*\*, p < 0.0001 \*\*\*, p < 0.00001 \*\*\*\*.

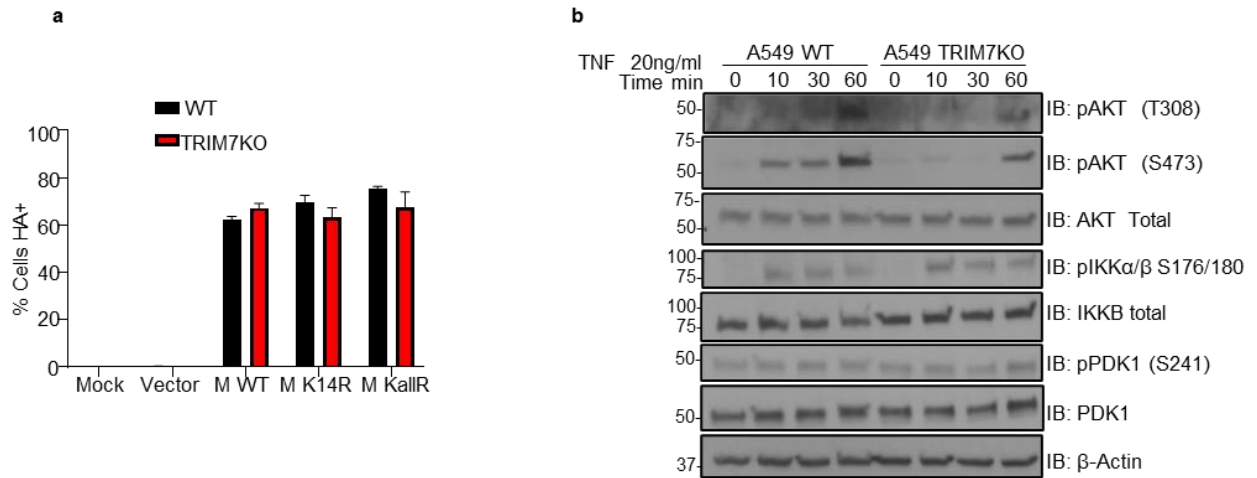

**Figure S5. TRIM7KO cells have impaired activation of AKT pathway after TNF stimulation.** a) frequency of cells transfected with M-WT, M-K14R and M-KallR. b) western blot of A549 WT and TRIM7 KO starved for 8h and then stimulated with 20ng/ml of TNF for 10, 30 and 60 minutes.



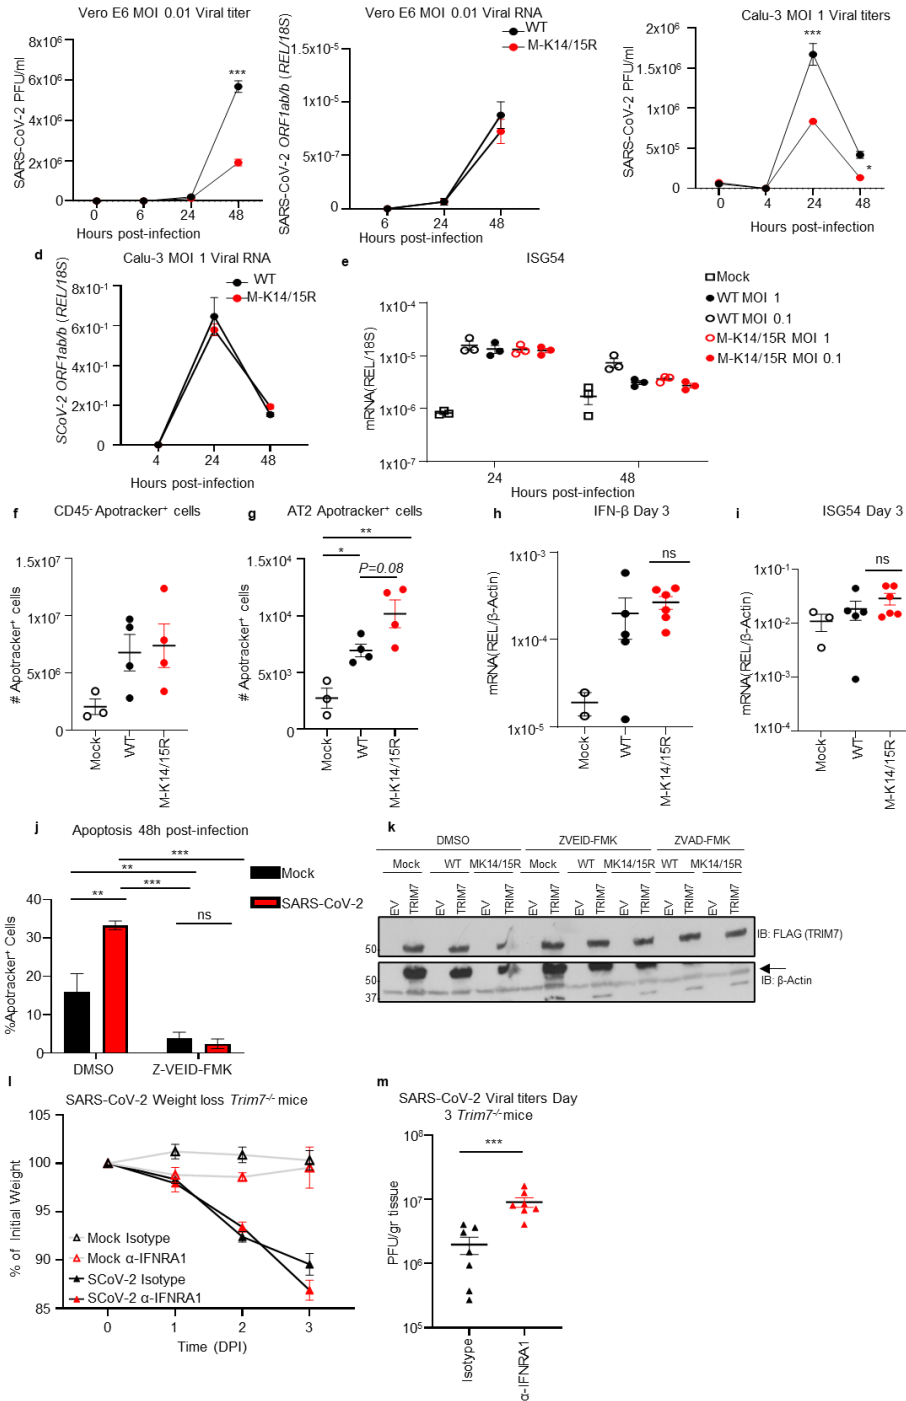

**Figure S6. M-K14/15R virus has defective budding but no IFN response is affected.** Vero E6 and Calu-3 infected with SARS-CoV-2 WT and M-K14/K15R MOI of 0.01 and 1 respectively. a) viral titers and b) viral RNA in Vero E6. c) viral titers and d) viral RNA in Calu-3. e) ISG54 expression in Calu-3 cells. WT mice infected with WT or M-K14/15R. f) lung CD45<sup>-</sup> cells Apotracker<sup>+</sup> and g) lung Alveolar Type 2 (AT2) cells (CD45<sup>-</sup> CD31<sup>-</sup> CD24<sup>-</sup> Podoplanin<sup>-</sup> EpCAM<sup>+</sup> MHC-II<sup>+</sup>) positive for Apotracker staining. h) mRNA levels of IFN-β, and i) ISG54. j) frequency of HEK 293T-hACE-2 cells infected with SARS-CoV-2 and treated with vehicle or 50μM of Z-VEID-FMK stained with Apotracker Green 48h post-infection. k) western blot analysis of expression of TRIM7-FLAG in 293T cells infected with CoV-2 WT and M-K14/K15R MOI 0.1 and treated with caspases inhibitors Z-VEID and Z-VAD. *Trim7*<sup>-/-</sup> mice treated with anti-IFNRA1 or isotype mock (n=3 males each group) at day 1 before infection and infected intranasal with SARS-CoV-2 CMA3p20 (n=7, 5 females and 2 males) for 3 days. l) weight loss and m) Viral lung titers. Data are depicted as Mean ± SEM. T-test analysis, one-way or 2-way Tukey's multiple comparisons tests. p < 0.001 \*\*, p < 0.0001 \*\*\*, p < 0.00001 \*\*\*\*.

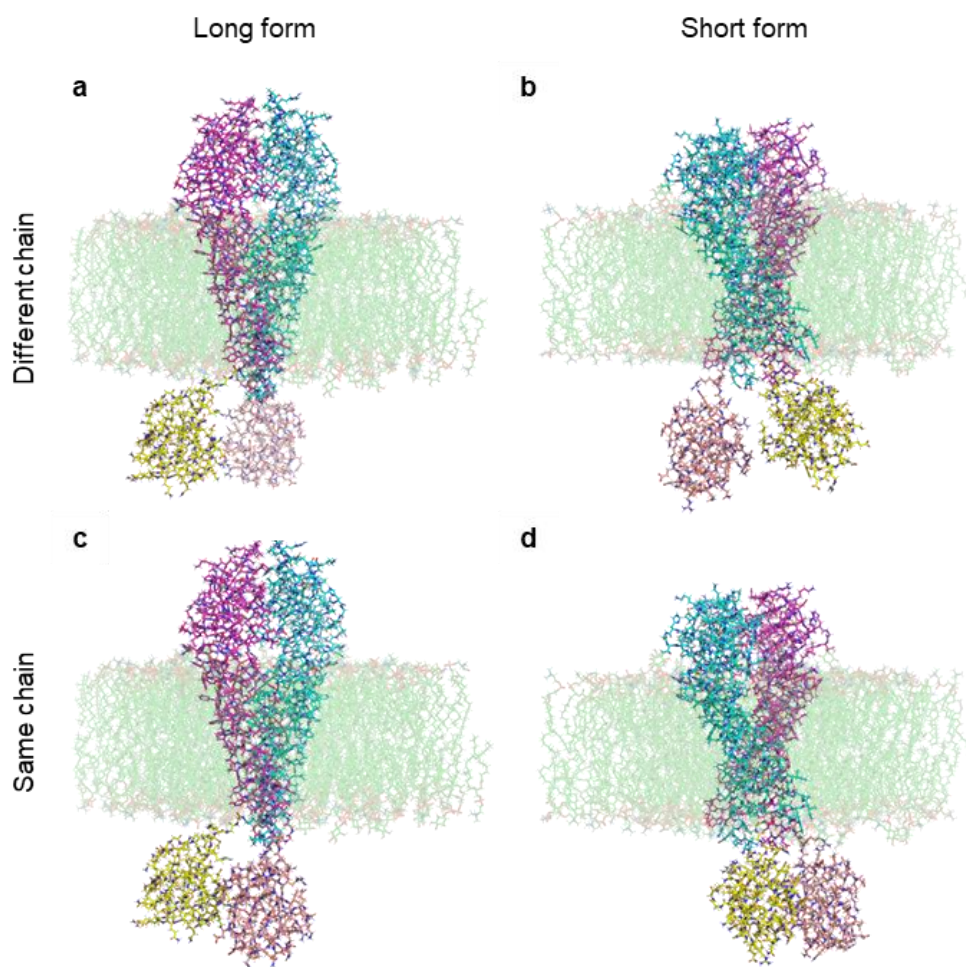

**Figure S7. Structural modeling of M. Modeling of different possible ubiquitinated M dimers.** The two chains of the M homodimer are shown in cyan and magenta whereas ubiquitin (Ub) is presented in yellow and salmon (the membrane is shown in green). a) long form of M (PDB 7VGR) with Ub attached to K14 and K15 in different chains. b) short form of M (PDB 7VGS) with Ub attached to K14 and K15 in different chains. c) long form of M with Ub attached to K14 and K15 in the same chain. d) short form of M with Ub attached to K14 and K15 of the same chain. Energetically based on the estimations with Surfaces, model A is the most favorable of the four, with full system  $\Delta\Delta G$  calculations showing  $\Delta\Delta G_{A \rightarrow B} = 3.89$  kcal/mol,  $\Delta\Delta G_{A \rightarrow C} = 1.01$  kcal/mol,  $\Delta\Delta G_{C \rightarrow D} = 5.12$  kcal/mol, and  $\Delta\Delta G_{B \rightarrow D} = 2.24$  kcal/mol. In both cases (double ubiquitination in the same, or different chains), the long form is preferred.



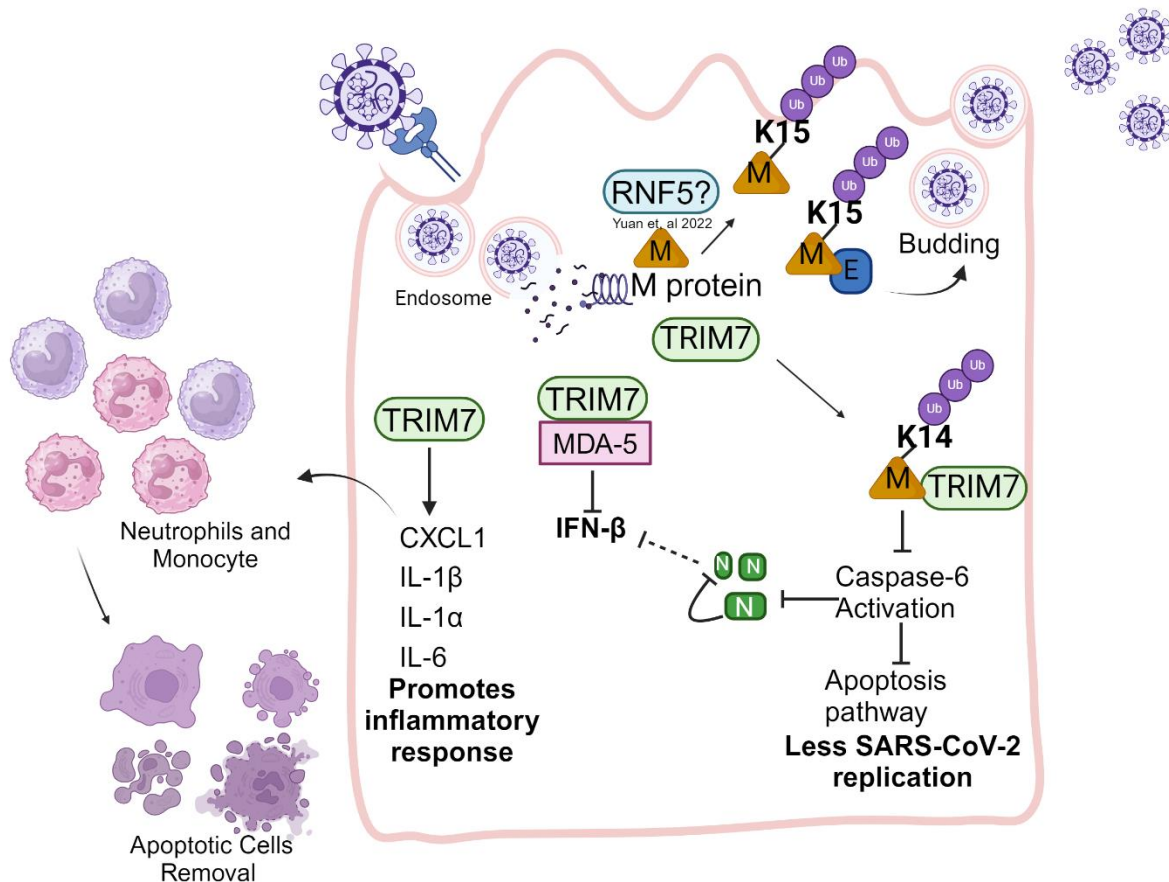

**Figure S8. Multifunctional role of TRIM7 during SARS-CoV-2 infection.** M protein can be ubiquitinated possibly by RNF5 on K15 residue, this is important for virus budding. On the other hand, TRIM7 can ubiquitinate M protein in the K14 residue, this ubiquitination is important to regulate caspase-6 activation and to inhibit apoptosis as well as to reduce the cleavage of N that could in turn inhibit the IFN-I production. TRIM7 can also interact with cytosolic receptor MDA-5 and inhibit the promoter activity of IFN-β by a mechanism that still unknown. TRIM7 is important to promote the production of pro-inflammatory cytokines IL-6, IL-1β and IL-1α as well as the chemokine CXCL1 that recruits neutrophils and monocytes to the lung, here these cells promote the removal of the apoptotic cells induced by SARS-CoV-2 and contribute with tissue repair. Created with BioRender.com.

Table 1. Mutations on Membrane protein K14 residue across clades.

| Clade | Residue Mutation | Sample Mutation count | Total Samples in Clade | Clade mutation % | Total Mutations | Clade Total Mutations % |
|-------|------------------|-----------------------|------------------------|------------------|-----------------|-------------------------|
| 19A   | K14del           | 113                   | 11833                  | 0.955            | 113             | 0.955                   |
| 19B   | K14del           | 11                    | 7387                   | 0.1489           | 11              | 0.149                   |
| 20A   | K14R             | 3                     | 120679                 | 0.0025           | 274             | 0.227                   |
| 20A   | K14E             | 1                     | 120679                 | 0.0008           | 274             | 0.227                   |
| 20A   | K14del           | 270                   | 120679                 | 0.2237           | 274             | 0.227                   |
| 20B   | K14R             | 3                     | 104912                 | 0.0029           | 137             | 0.131                   |
| 20B   | K14del           | 134                   | 104912                 | 0.1277           | 137             | 0.131                   |
| 21A   | K14E             | 2                     | 53799                  | 0.0037           | 2               | 0.004                   |
| 20E   | K14E             | 4                     | 103929                 | 0.0038           | 8               | 0.008                   |
| 20E   | K14del           | 4                     | 103929                 | 0.0038           | 8               | 0.008                   |
| 20C   | K14E             | 8                     | 68701                  | 0.0116           | 54              | 0.079                   |
| 20C   | K14F             | 1                     | 68701                  | 0.0015           | 54              | 0.079                   |
| 20C   | K14R             | 1                     | 68701                  | 0.0015           | 54              | 0.079                   |
| 20C   | K14del           | 44                    | 68701                  | 0.064            | 54              | 0.079                   |
| 21H   | K14E             | 5                     | 6144                   | 0.0814           | 5               | 0.081                   |
| 21B   | K14R             | 1                     | 1045                   | 0.0957           | 1               | 0.096                   |
| 20I   | K14*             | 1                     | 651108                 | 0.0002           | 23              | 0.004                   |
| 20I   | K14R             | 5                     | 651108                 | 0.0008           | 23              | 0.004                   |
| 20I   | K14Q             | 1                     | 651108                 | 0.0002           | 23              | 0.004                   |
| 20I   | K14E             | 5                     | 651108                 | 0.0008           | 23              | 0.004                   |
| 20I   | K14G             | 1                     | 651108                 | 0.0002           | 23              | 0.004                   |
| 20I   | K14del           | 7                     | 651108                 | 0.0011           | 23              | 0.004                   |
| 20I   | K14T             | 3                     | 651108                 | 0.0005           | 23              | 0.004                   |
| 20D   | K14del           | 9                     | 6020                   | 0.1495           | 9               | 0.15                    |
| 21I   | K14E             | 2                     | 151093                 | 0.0013           | 7               | 0.005                   |
| 21I   | K14R             | 1                     | 151093                 | 0.0007           | 7               | 0.005                   |
| 21I   | K14del           | 4                     | 151093                 | 0.0026           | 7               | 0.005                   |
| 21J   | K14I             | 8                     | 2737780                | 0.0003           | 111             | 0.004                   |
| 21J   | K14R             | 15                    | 2737780                | 0.0005           | 111             | 0.004                   |
| 21J   | K14Q             | 8                     | 2737780                | 0.0003           | 111             | 0.004                   |
| 21J   | K14E             | 60                    | 2737780                | 0.0022           | 111             | 0.004                   |
| 21J   | K14del           | 19                    | 2737780                | 0.0007           | 111             | 0.004                   |
| 21J   | K14T             | 1                     | 2737780                | 0                | 111             | 0.004                   |
| 20H   | K14R             | 14                    | 9553                   | 0.1466           | 16              | 0.167                   |
| 20H   | K14del           | 2                     | 9553                   | 0.0209           | 16              | 0.167                   |
| 21F   | K14R             | 1                     | 33858                  | 0.003            | 2               | 0.006                   |
| 21F   | K14del           | 1                     | 33858                  | 0.003            | 2               | 0.006                   |

|     |        |    |         |        |    |       |
|-----|--------|----|---------|--------|----|-------|
| 21C | K14E   | 1  | 41628   | 0.0024 | 1  | 0.002 |
| 21K | K14E   | 8  | 1591473 | 0.0005 | 70 | 0.004 |
| 21K | K14G   | 1  | 1591473 | 0.0001 | 70 | 0.004 |
| 21K | K14del | 54 | 1591473 | 0.0034 | 70 | 0.004 |
| 21K | K14R   | 7  | 1591473 | 0.0004 | 70 | 0.004 |
| 21L | K14E   | 2  | 1143006 | 0.0002 | 57 | 0.005 |
| 21L | K14del | 46 | 1143006 | 0.004  | 57 | 0.005 |
| 21L | K14T   | 5  | 1143006 | 0.0004 | 57 | 0.005 |
| 21L | K14R   | 4  | 1143006 | 0.0003 | 57 | 0.005 |
| 22D | K14Q   | 1  | 31187   | 0.0032 | 2  | 0.006 |
| 22D | K14R   | 1  | 31187   | 0.0032 | 2  | 0.006 |
| 22F | K14R   | 2  | 20443   | 0.0098 | 2  | 0.01  |
| 22C | K14R   | 1  | 170929  | 0.0006 | 4  | 0.002 |
| 22C | K14E   | 1  | 170929  | 0.0006 | 4  | 0.002 |
| 22C | K14G   | 1  | 170929  | 0.0006 | 4  | 0.002 |
| 22C | K14del | 1  | 170929  | 0.0006 | 4  | 0.002 |
| 22B | K14E   | 4  | 781430  | 0.0005 | 57 | 0.007 |
| 22B | K14del | 10 | 781430  | 0.0013 | 57 | 0.007 |
| 22B | K14R   | 43 | 781430  | 0.0055 | 57 | 0.007 |
| 23C | K14R   | 1  | 28556   | 0.0035 | 1  | 0.004 |
| 23A | K14E   | 1  | 161212  | 0.0006 | 3  | 0.002 |
| 23A | K14R   | 2  | 161212  | 0.0012 | 3  | 0.002 |
| 23B | K14R   | 2  | 31125   | 0.0064 | 2  | 0.006 |
| 23E | K14E   | 1  | 11253   | 0.0089 | 7  | 0.062 |
| 23E | K14R   | 6  | 11253   | 0.0533 | 7  | 0.062 |
| 22E | K14R   | 5  | 195894  | 0.0026 | 6  | 0.003 |
| 22E | K14del | 1  | 195894  | 0.0005 | 6  | 0.003 |

Table 2. Table 1. Mutations on Membrane protein K15 residue across clades.

| Clade | Residue Mutation | Sample Mutation count | Total Samples in Clade | Clade Individual mutation % | Total Mutations | Clade Total Mutation % |
|-------|------------------|-----------------------|------------------------|-----------------------------|-----------------|------------------------|
| 19A   | K15*             | 3                     | 11833                  | 0.0254                      | 4               | 0.034                  |
| 19A   | K15N             | 1                     | 11833                  | 0.0085                      | 4               | 0.034                  |
| 20A   | K15M             | 2                     | 120679                 | 0.0017                      | 19              | 0.016                  |
| 20A   | K15E             | 8                     | 120679                 | 0.0066                      | 19              | 0.016                  |
| 20A   | K15S             | 3                     | 120679                 | 0.0025                      | 19              | 0.016                  |
| 20A   | K15R             | 1                     | 120679                 | 0.0008                      | 19              | 0.016                  |
| 20A   | K15del           | 5                     | 120679                 | 0.0041                      | 19              | 0.016                  |
| 19B   | K15del           | 1                     | 7387                   | 0.0135                      | 35              | 0.474                  |
| 19B   | K15R             | 34                    | 7387                   | 0.4603                      | 35              | 0.474                  |
| 20B   | K15N             | 26                    | 104912                 | 0.0248                      | 32              | 0.031                  |
| 20B   | K15R             | 2                     | 104912                 | 0.0019                      | 32              | 0.031                  |
| 20B   | K15del           | 4                     | 104912                 | 0.0038                      | 32              | 0.031                  |
| 21A   | K15N             | 7                     | 53799                  | 0.013                       | 8               | 0.015                  |
| 21A   | K15E             | 1                     | 53799                  | 0.0019                      | 8               | 0.015                  |
| 20C   | K15N             | 55                    | 68701                  | 0.0801                      | 106             | 0.154                  |
| 20C   | K15R             | 50                    | 68701                  | 0.0728                      | 106             | 0.154                  |
| 20C   | K15E             | 1                     | 68701                  | 0.0015                      | 106             | 0.154                  |
| 21H   | K15N             | 1                     | 6144                   | 0.0163                      | 1               | 0.016                  |
| 20E   | K15N             | 19                    | 103929                 | 0.0183                      | 25              | 0.024                  |
| 20E   | K15T             | 1                     | 103929                 | 0.001                       | 25              | 0.024                  |
| 20E   | K15R             | 2                     | 103929                 | 0.0019                      | 25              | 0.024                  |
| 20E   | K15del           | 3                     | 103929                 | 0.0029                      | 25              | 0.024                  |
| 20J   | K15Q             | 2                     | 29088                  | 0.0069                      | 2               | 0.007                  |
| 20I   | K15M             | 7                     | 651108                 | 0.0011                      | 102             | 0.016                  |
| 20I   | K15N             | 22                    | 651108                 | 0.0034                      | 102             | 0.016                  |
| 20I   | K15E             | 26                    | 651108                 | 0.004                       | 102             | 0.016                  |
| 20I   | K15T             | 1                     | 651108                 | 0.0002                      | 102             | 0.016                  |
| 20I   | K15R             | 40                    | 651108                 | 0.0061                      | 102             | 0.016                  |
| 20I   | K15del           | 6                     | 651108                 | 0.0009                      | 102             | 0.016                  |
| 20D   | K15N             | 1                     | 6020                   | 0.0166                      | 1               | 0.017                  |
| 20D   | K15del           | 1                     | 6020                   | 0.0166                      | 1               | 0.017                  |
| 21I   | K15N             | 4                     | 151093                 | 0.0026                      | 37              | 0.024                  |
| 21I   | K15Q             | 1                     | 151093                 | 0.0007                      | 37              | 0.024                  |
| 21I   | K15E             | 24                    | 151093                 | 0.0159                      | 37              | 0.024                  |
| 21I   | K15del           | 3                     | 151093                 | 0.002                       | 37              | 0.024                  |
| 21I   | K15R             | 5                     | 151093                 | 0.0033                      | 37              | 0.024                  |
| 21J   | K15N             | 2433                  | 2737780                | 0.0889                      | 2785            | 0.102                  |
| 21J   | K15Q             | 165                   | 2737780                | 0.006                       | 2785            | 0.102                  |
| 21J   | K15T             | 7                     | 2737780                | 0.0003                      | 2785            | 0.102                  |
| 21J   | K15R             | 123                   | 2737780                | 0.0045                      | 2785            | 0.102                  |
| 21J   | K15del           | 29                    | 2737780                | 0.0011                      | 2785            | 0.102                  |
| 21J   | K15M             | 11                    | 2737780                | 0.0004                      | 2785            | 0.102                  |

|     |        |    |         |        |      |       |
|-----|--------|----|---------|--------|------|-------|
| 21J | K15E   | 17 | 2737780 | 0.0006 | 2785 | 0.102 |
| 20H | K15del | 2  | 9553    | 0.0209 | 3    | 0.031 |
| 20H | K15R   | 1  | 9553    | 0.0105 | 3    | 0.031 |
| 21F | K15del | 1  | 33858   | 0.003  | 1    | 0.003 |
| 21C | K15N   | 1  | 41628   | 0.0024 | 1    | 0.002 |
| 20G | K15N   | 4  | 83603   | 0.0048 | 6    | 0.007 |
| 20G | K15R   | 2  | 83603   | 0.0024 | 6    | 0.007 |
| 21K | K15T   | 1  | 1591473 | 0.0001 | 166  | 0.01  |
| 21K | K15N   | 31 | 1591473 | 0.0019 | 166  | 0.01  |
| 21K | K15R   | 35 | 1591473 | 0.0022 | 166  | 0.01  |
| 21K | K15Q   | 22 | 1591473 | 0.0014 | 166  | 0.01  |
| 21K | K15del | 55 | 1591473 | 0.0035 | 166  | 0.01  |
| 21K | K15M   | 6  | 1591473 | 0.0004 | 166  | 0.01  |
| 21K | K15E   | 16 | 1591473 | 0.001  | 166  | 0.01  |
| 21L | K15N   | 7  | 1143006 | 0.0006 | 71   | 0.006 |
| 21L | K15R   | 11 | 1143006 | 0.001  | 71   | 0.006 |
| 21L | K15del | 52 | 1143006 | 0.0045 | 71   | 0.006 |
| 21L | K15E   | 1  | 1143006 | 0.0001 | 71   | 0.006 |
| 22D | K15N   | 5  | 31187   | 0.016  | 7    | 0.022 |
| 22D | K15R   | 2  | 31187   | 0.0064 | 7    | 0.022 |
| 22F | K15del | 1  | 20443   | 0.0049 | 5    | 0.024 |
| 22F | K15N   | 1  | 20443   | 0.0049 | 5    | 0.024 |
| 22F | K15R   | 3  | 20443   | 0.0147 | 5    | 0.024 |
| 22C | K15N   | 1  | 170929  | 0.0006 | 7    | 0.004 |
| 22C | K15R   | 5  | 170929  | 0.0029 | 7    | 0.004 |
| 22C | K15del | 1  | 170929  | 0.0006 | 7    | 0.004 |
| 22B | K15del | 13 | 781430  | 0.0017 | 106  | 0.014 |
| 22B | K15N   | 6  | 781430  | 0.0008 | 106  | 0.014 |
| 22B | K15E   | 3  | 781430  | 0.0004 | 106  | 0.014 |
| 22B | K15R   | 79 | 781430  | 0.0101 | 106  | 0.014 |
| 22B | K15Q   | 5  | 781430  | 0.0006 | 106  | 0.014 |
| 22A | K15N   | 1  | 95899   | 0.001  | 1    | 0.001 |
| 23C | K15R   | 1  | 28556   | 0.0035 | 1    | 0.004 |
| 23A | K15N   | 4  | 161212  | 0.0025 | 11   | 0.007 |
| 23A | K15R   | 7  | 161212  | 0.0043 | 11   | 0.007 |
| 23B | K15del | 1  | 31125   | 0.0032 | 1    | 0.003 |
| 23D | K15N   | 69 | 36429   | 0.1894 | 72   | 0.198 |
| 23D | K15Q   | 1  | 36429   | 0.0027 | 72   | 0.198 |
| 23D | K15R   | 1  | 36429   | 0.0027 | 72   | 0.198 |
| 23D | K15E   | 1  | 36429   | 0.0027 | 72   | 0.198 |
| 23E | K15R   | 7  | 11253   | 0.0622 | 7    | 0.062 |
| 22E | K15del | 1  | 195894  | 0.0005 | 4    | 0.002 |
| 22E | K15M   | 1  | 195894  | 0.0005 | 4    | 0.002 |
| 22E | K15N   | 1  | 195894  | 0.0005 | 4    | 0.002 |
| 22E | K15R   | 1  | 195894  | 0.0005 | 4    | 0.002 |
| 23F | K15N   | 1  | 31861   | 0.0031 | 4    | 0.013 |

|     |      |   |       |        |   |       |
|-----|------|---|-------|--------|---|-------|
| 23F | K15Q | 2 | 31861 | 0.0063 | 4 | 0.013 |
| 23F | K15R | 1 | 31861 | 0.0031 | 4 | 0.013 |



Table 3. Table 1. Mutations on Membrane protein K14/K15 residue across clades.

| Clade | Residue Mutation | Sample Mutation count | Total Samples in Clade | Clade mutation % | Total Mutations | Clade Total Mutations % |
|-------|------------------|-----------------------|------------------------|------------------|-----------------|-------------------------|
| 19B   | K14del, K15del   | 1                     | 11833                  | 0.008            | 1               | 0.008                   |
| 20A   | K14del, K15del   | 4                     | 120679                 | 0.003            | 4               | 0.003                   |
| 20B   | K14del, K15del   | 2                     | 104912                 | 0.002            | 2               | 0.002                   |
| 20I   | K14del, K15del   | 6                     | 651108                 | 0.001            | 6               | 0.001                   |
| 20D   | K14del, K15del   | 1                     | 6020                   | 0.017            | 1               | 0.017                   |
| 20E   | K14del, K15del   | 3                     | 103929                 | 0.003            | 3               | 0.003                   |
| 21I   | K14del, K15del   | 3                     | 151093                 | 0.002            | 3               | 0.002                   |
| 21J   | K14del, K15del   | 19                    | 2737780                | 0.001            | 19              | 0.001                   |
| 20H   | K14del, K15del   | 2                     | 9553                   | 0.021            | 2               | 0.021                   |
| 21F   | K14del, K15del   | 1                     | 33858                  | 0.003            | 1               | 0.003                   |
| 21K   | K14del, K15del   | 51                    | 1591473                | 0.003            | 52              | 0.003                   |
| 21K   | K14R, K15Q       | 1                     | 1591473                | 0                | 52              | 0.003                   |
| 21L   | K14del, K15del   | 45                    | 1143006                | 0.004            | 45              | 0.004                   |
| 22C   | K14del, K15del   | 2                     | 170929                 | 0.001            | 2               | 0.001                   |
| 22B   | K14del, K15del   | 11                    | 781430                 | 0.001            | 11              | 0.001                   |
| 22E   | K14del, K15del   | 1                     | 195894                 | 0.001            | 1               | 0.001                   |
